# Supplementary material for: Interactions of nitroxide radicals with dendrimer-entrapped Au8-clusters: a fluorescent nanosensor for intracellular imaging of ascorbic acid
Source: Royal Society of Chemistry journal article supplement (doi:10.1039/c4tb01657b), 2014-11-07
Supplement: c4tb01657b1.pdf [file c4tb01657b1.pdf]

## Supporting Information

### **Interactions of Nitroxide Radicals with Dendrimer-entrapped Au<sub>8</sub>-clusters: A Fluorescent Nanosensor for Intracellular Imaging of Ascorbic Acid**

Ching-Ping Liu, Te-Haw Wu, Chia-Yeh Liu, and Shu-Yi Lin\*

*Institute of Biomedical Engineering and Nanomedicine, National Health Research Institutes, 35 Keyan Road, Zhunan 350, Taiwan*

**The detailed calculation of  $V$  (the static quenching constant) and  $K_{SV}$  (equal to  $K_D$ , the dynamic quenching constant) in the modified Stern-Volmer eqn (1):**

As shown in Fig. 1b, it is apparent that the ratio of  $F_0/F$  gives an upward curving plot. By treating the data according to the modified Stern-Volmer eqn. (1), plotting  $F_0/F_{exp}(V[Q])$  vs.  $[Q]$  for varying  $V$  until a linear plot is obtained and then giving a  $V$  of  $18 \text{ M}^{-1}$  (equal to  $0.018 \text{ mM}^{-1}$ ). After that, the linear plot of  $F_0/F_{exp}(0.018[Q])$  against  $[Q]$  represents correction for static quenching of the steady-state fluorescence (red dots in Fig. 1b) and its slope was observed, giving a  $K_{SV}$  ( $=K_D$ ) of  $23 \text{ M}^{-1}$  (equal to  $0.023 \text{ mM}^{-1}$ ).

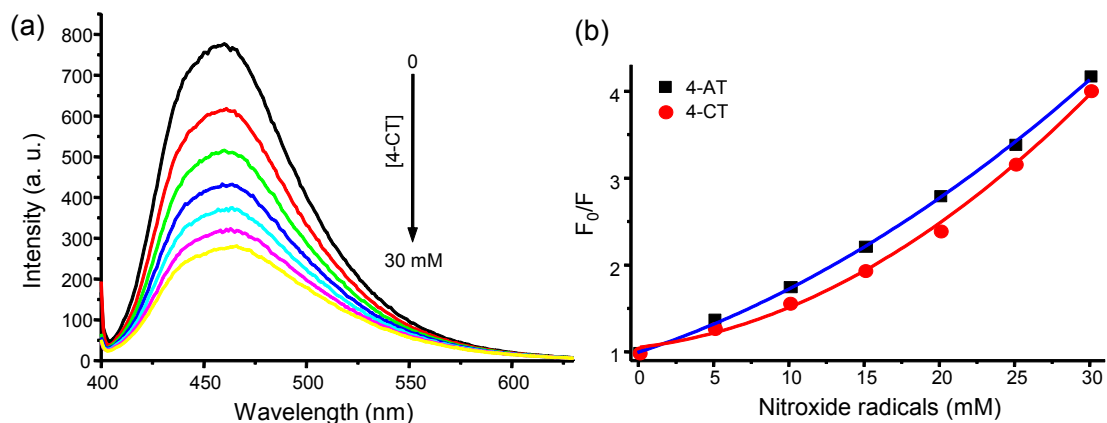

**Fig. S1** (a) Changes in the fluorescence spectra of the  $\text{Au}_8$ -cluster solution (0.25 mM) resulting from the addition of various concentrations of 4-CT (0-30 mM) were measured at an excitation wavelength of 390 nm. (b) Fluorescence quenching curves of the  $\text{Au}_8$ -cluster yielded by the addition of various concentrations of 4-AT (blue line) and 4-CT (red line), respectively.

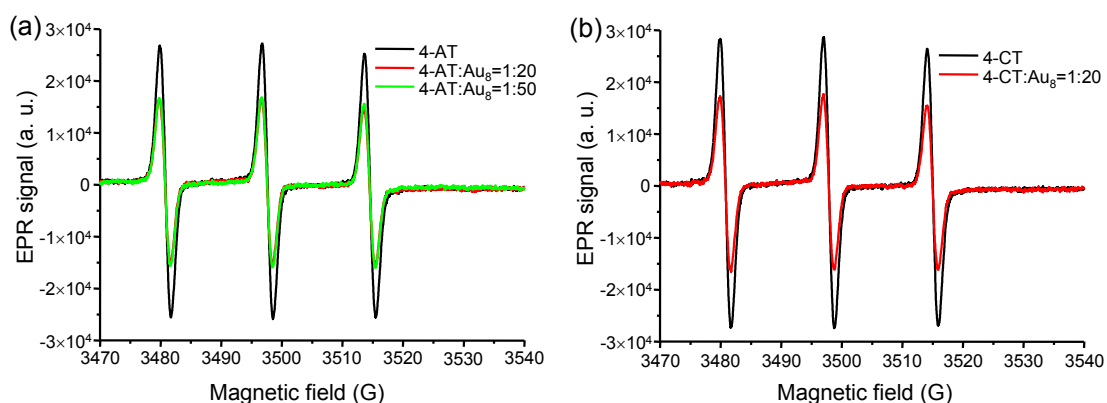

**Fig. S2** EPR spectra of aqueous solutions prepared with (a) 4-AT and two molar ratios of 4-AT/ $\text{Au}_8$ -clusters (fixed  $[4\text{-AT}] = 1.0 \mu\text{M}$ ); (b) 4-CT and the molar ratio of 4-CT/the  $\text{Au}_8$ -cluster as 1:20, respectively.

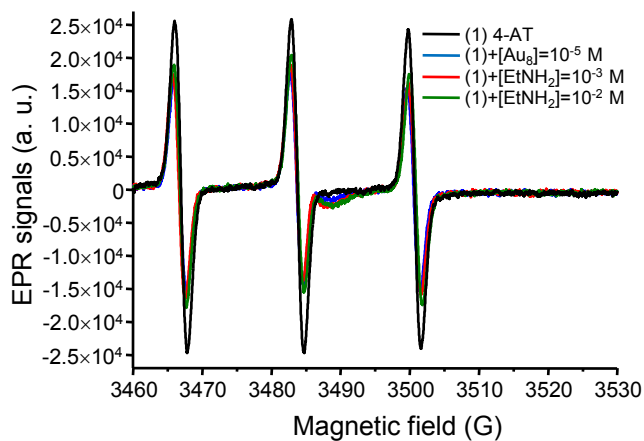

**Fig. S3** EPR spectra of aqueous solutions prepared with 4-AT of 1.0  $\mu$ M as solution (1), solution (1) + [Au<sub>8</sub>]=10<sup>-5</sup> M, solution (1) + [EtNH<sub>2</sub>]=10<sup>-3</sup> M, and solution (1) + [EtNH<sub>2</sub>]=10<sup>-2</sup> M, respectively.

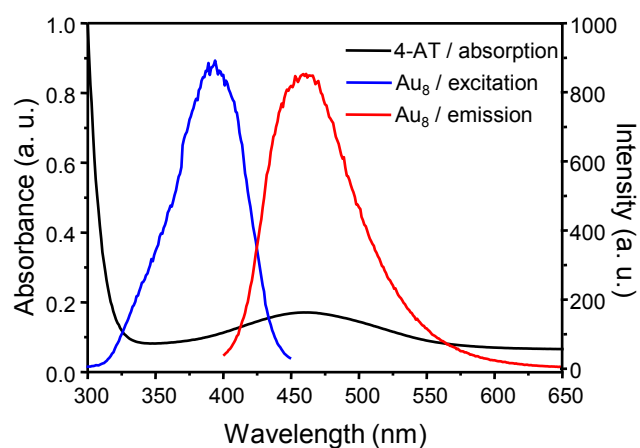

**Fig. S4** Comparison of the absorption spectrum for 4-AT and the excitation and emission spectra of the Au<sub>8</sub>-cluster in aqueous solutions.

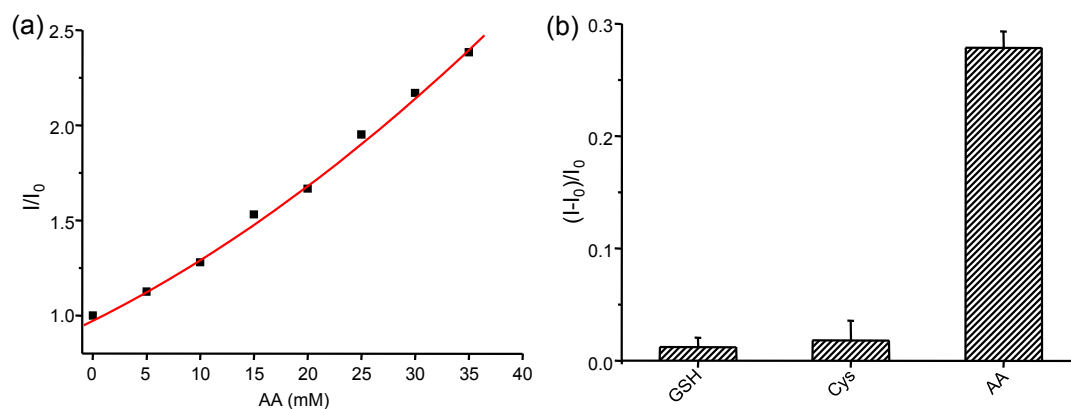

**Fig. S5** The fluorescence restoration curve of the mixture (Au<sub>8</sub>-clusters + 4-AT) yielded by the addition of various concentrations of AA (0-35 mM). (b) Relative fluorescence intensities (I-I<sub>0</sub>)/I<sub>0</sub> at emission of 460 nm from the mixture of Au<sub>8</sub>-clusters and 4-AT after the addition of GSH, Cys, and AA, respectively.

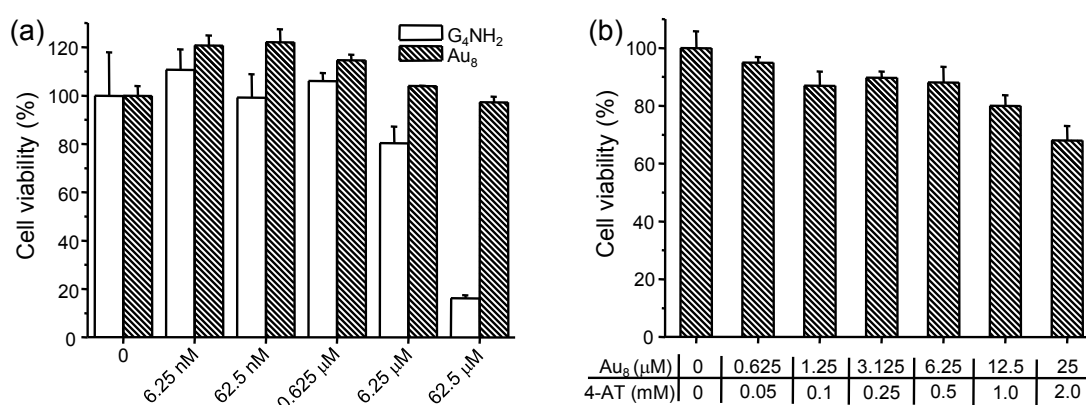

**Fig. S6** Cell viability of (a) A549 cells incubated with dendrimers (G<sub>4</sub>NH<sub>2</sub>) and Au<sub>8</sub>-clusters, respectively (referred to our previous work in ref. 14), and (b) MDA-MB-231 cells incubated with the mixture of Au<sub>8</sub>-clusters and 4-AT (molar ratio 1:80) at different concentrations for 24 h.

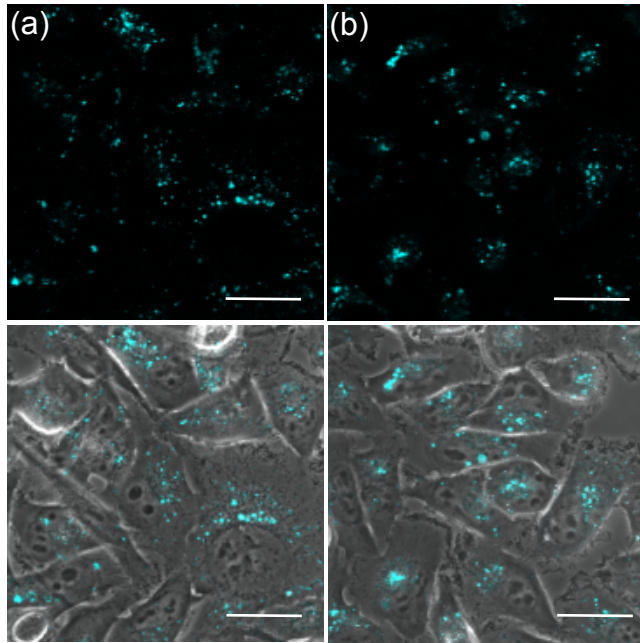

**Fig. S7** The confocal fluorescence images (upper panels) and their merged transmission images (lower panels) of MDA-MB-231 breast cancer cells treated with (a) Au<sub>8</sub>-clusters (0.5 μM) and (b) Au<sub>8</sub>-clusters (0.5 μM) mixing with AA (5.0 mM) for 16 h, respectively. The scale bars are 30 μm.

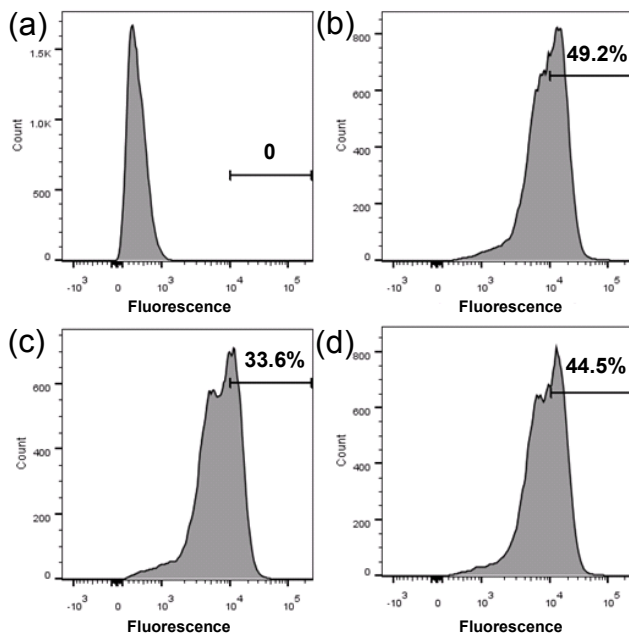

**Fig. S8** Flow cytometric analysis was used to calculate the percent of gated cells for (a) cells without treatment as control and (b) cells treated with Au<sub>8</sub>-clusters, (c) Au<sub>8</sub>+4-AT and (d) Au<sub>8</sub>+4-AT+AA, respectively.

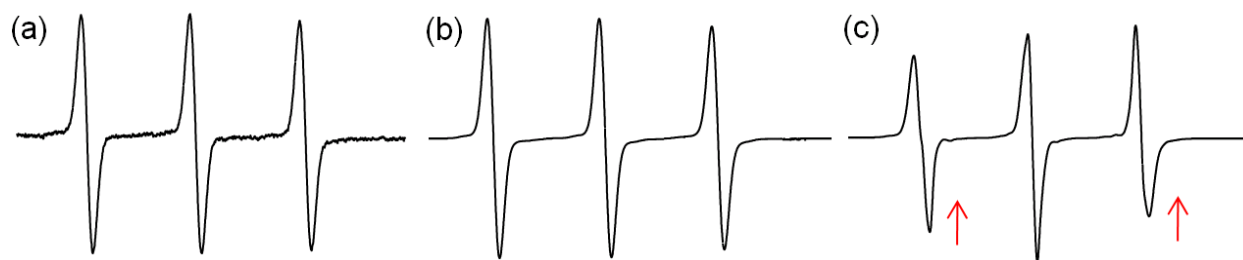

**Fig. S9** Comparison of EPR spectra for samples containing the following: (a) the aqueous solution of 4-AT, (b) the solution of 4-AT and Au<sub>8</sub>-clusters with O<sub>2</sub> purge for 10 min and the reaction then maintained for one week, and (c) the mixture of 4-AT and 4-OT (with a molar ratio of 1:0.2). Note that asymmetry is appeared, indicative of a mixture of nitroxide radicals including 4-AT and 4-OT.
